# Supplementary material for: Dynamic Landscape of Extracellular Vesicle-Associated Proteins Is Related to Treatment Response of Patients with Metastatic Breast Cancer
Source: MDPI journal article supplement (doi:10.3390/membranes11110880), 2021-11-16
Supplement: s1 [file s1]

Supplementary Data Table S5. Summary of candidate EV-associated proteins have a potential association with breast cancer aggression/metastasis/invasion and survival.

|                                | Protein ID | Name                                       | RNA expression,<br>TCGA/Protein Atlas |          |          | Protein expression,<br>Tang 2018 |     |      |
|--------------------------------|------------|--------------------------------------------|---------------------------------------|----------|----------|----------------------------------|-----|------|
|                                |            |                                            | Type                                  | p value  | Survival | p value                          | low | high |
| Increased in the non-responder | P23528     | Cofilin-1                                  | T                                     | <1E-12   | NS       | 0.017                            | 100 | 27   |
|                                | P14618     | Pyruvate kinase PKM                        | -                                     | -        | -        | 0.034                            | 100 | 36   |
|                                | P04075     | Fructose-bisphosphate aldolase A           | T                                     | <1E-12   | NS       | 0.044                            | 97  | 17   |
|                                | P68363     | Tubulin alpha-1B chain                     | T                                     | 1.62E-12 | 0.00035  | NS                               | -   | -    |
|                                | P62937     | Peptidyl-prolyl cis-trans isomerase A      | T                                     | <1E-12   | NS       | 0.032                            | 100 | 36   |
|                                | P02751     | Fibronectin                                | T                                     | <1E-12   | NS       | 0.0046                           | 36  | 15   |
|                                | P14625     | Endoplasmic reticulum chaperone            | T                                     | 1.62E-12 | NS       | NS                               | -   | -    |
|                                | P08670     | Vimentin                                   | N                                     | 1.62E-12 | NS       | NS                               | -   | -    |
|                                | Q9NZR1     | Tropomodulin-2                             | N                                     | <1E-12   | NS       | 0.0068                           | 97  | 48   |
|                                | P12109     | Collagen alpha-1(VI) chain                 | T                                     | <1E-12   | NS       | NS                               | -   | -    |
|                                | P55201     | Peregrin                                   | -                                     | NS       | NS       | NS                               | -   | -    |
|                                | P68431     | Histone H3.1                               | T                                     | 3.70E-05 | NS       | 0.015                            | 97  | 23   |
|                                | O60814     | Histone H2B type 1-K                       | T                                     | 1.62E-12 | NS       | NS                               | -   | -    |
|                                | P62979     | Ubiquitin-40S ribosomal protein S27a       | N                                     | <1E-12   | NS       | NS                               | -   | -    |
|                                | P06681     | Complement C2                              | T                                     | 2.27E-05 | NS       | 0.0013                           | -   | -    |
|                                | Q13093     | Platelet-activating factor acetylhydrolase | T                                     | 9.13E-02 | 0.033    | -                                | -   | -    |
|                                | Q8TCU4     | Alstrom syndrome protein 1                 | T                                     | 3.57E-02 | NS       | 0.045                            | 41  | 24   |
|                                | P07358     | Complement component C8 beta chain         | -                                     | NS       | NS       | NS                               | -   | -    |
|                                | P06703     | Protein S100-A6                            | N                                     | 1.77E-05 | NS       | 0.025                            | 10  | 39   |
|                                | P23142     | Fibulin-1                                  | N                                     | 2.18E-11 | NS       | 0.0052                           | 97  | 16   |
|                                | Q9BWP8     | Collectin-11                               | N                                     | 1.51E-06 | NS       | -                                | -   | -    |
|                                | P03952     | Plasma kallikrein                          | N                                     | 1.33E-07 | NS       | 0.025                            | 23  | 48   |
|                                | O43866     | CD5 antigen-like                           | -                                     | NS       | NS       | -                                | -   | -    |
| Decreased in the non-responder | Q8WZ42     | Titin                                      | -                                     | NS       | NS       | 0.037                            | 39  | 13   |
|                                | P02730     | Band 3 anion transport protein             | N                                     | 1.23E-04 | NS       | NS                               | -   | -    |
|                                | P08697     | Alpha-2-antiplasmin                        | N                                     | 6.29E-05 | NS       | NS                               | -   | -    |
|                                | Q96H78     | Solute carrier family 25 member 44         | T                                     | 1.62E-12 | NS       | NS                               | -   | -    |
|                                | P27169     | Serum paraoxonase/arylesterase 1           | N                                     | 4.77E-02 | NS       | NS                               | -   | -    |
|                                | Q96Q89     | Kinesin-like protein KIF20B                | T                                     | 1.62E-12 | NS       | NS                               | -   | -    |
|                                | P20851     | C4b-binding protein beta chain             | -                                     | NS       | NS       | -                                | -   | -    |
| Increased in the responder     | P04406     | Glyceraldehyde-3-phosphate dehydrogenase   | T                                     | <1E-12   | NS       | 0.015                            | 97  | 17   |
|                                | Q6FI13     | Histone H2A type 2-A                       | -                                     | -        | -        | 0.0089                           | 100 | 27   |
|                                | Q13201     | Multimerin-1                               | N                                     | <1E-12   | NS       | NS                               | -   | -    |
|                                | P32119     | Peroxiredoxin-2                            | T                                     | <1E-12   | NS       | 0.029                            | 70  | 23   |
|                                | P11277     | Spectrin beta chain, erythrocytic          | N                                     | 4.44E-03 | NS       | NS                               | -   | -    |
