# Supplementary material for: Dynamic Landscape of Extracellular Vesicle-Associated Proteins Is Related to Treatment Response of Patients with Metastatic Breast Cancer
Source: MDPI journal article supplement (doi:10.3390/membranes11110880), 2021-11-16

Figure S1. Full and uncropped western blot results.

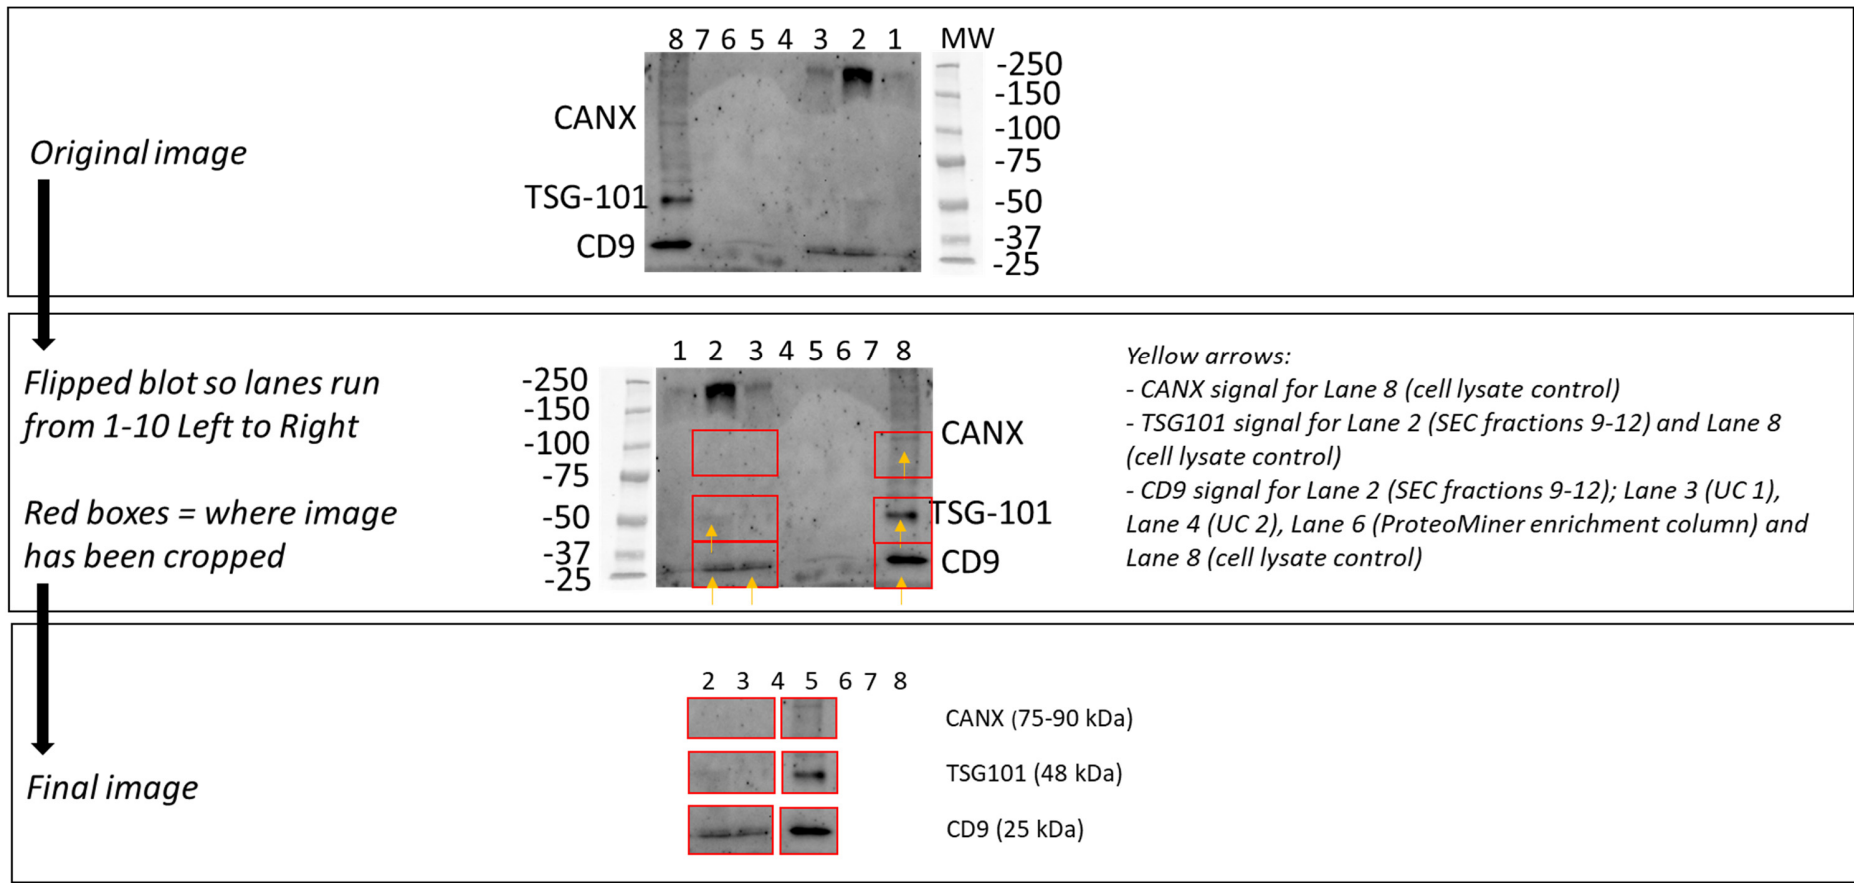

Figure S2. String analysis revealed the presence of two clusters within 23 EV associated proteins that were uniquely up-regulated in the non-responder.

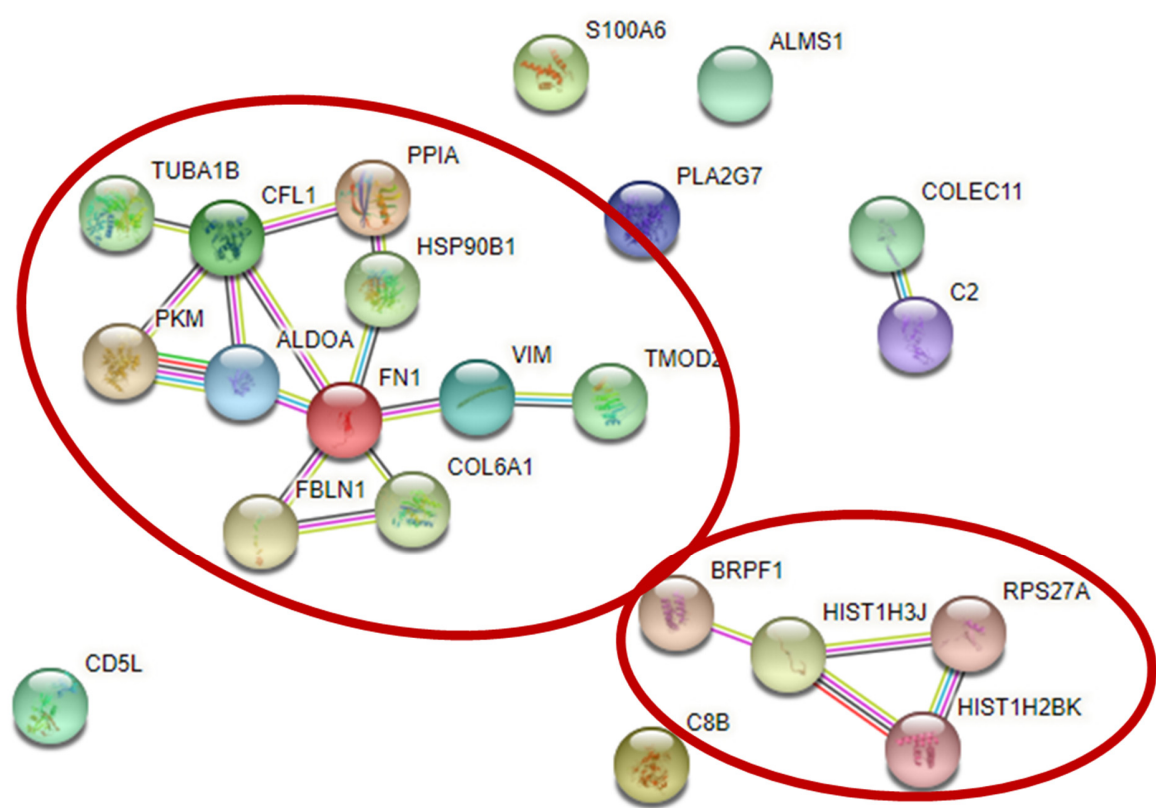

Supplement: s1 [file s1]
